# Supplementary material for: S-72, a Novel Orally Available Tubulin Inhibitor, Overcomes Paclitaxel Resistance via Inactivation of the STING Pathway in Breast Cancer
Source: Pharmaceuticals (Basel). 2023 May 15;16(5):749. doi: 10.3390/ph16050749 (PMC10221130; doi:10.3390/ph16050749)
Supplement: Supplementary file 1 [file pharmaceuticals-16-00749-s001.zip › pharmaceuticals-2312893-supplementary.pdf]

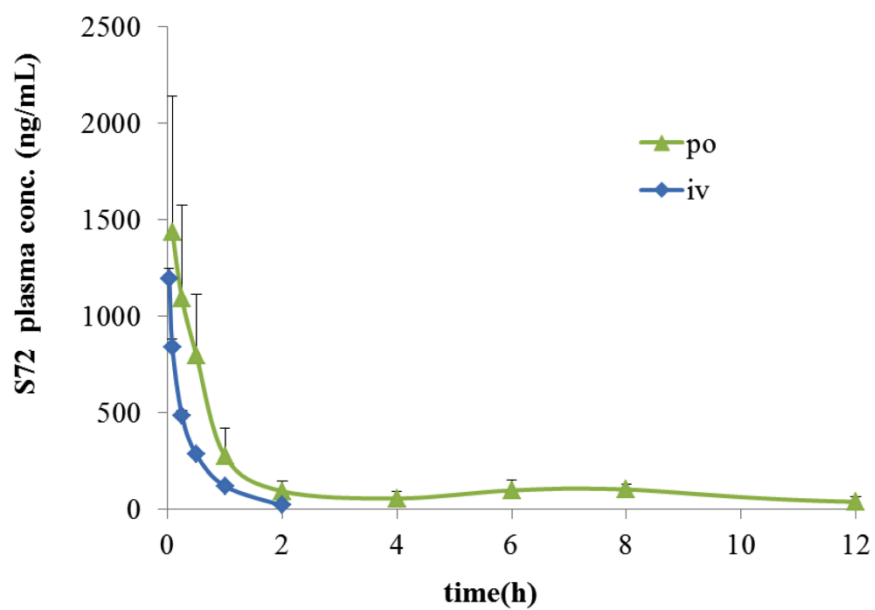

**Figure S1.** Plasma concentration-time curves of S-72. ICR mice were orally administered 5 mg/kg S-72 or intravenously injected 1 mg/kg S-72. Plasma concentrations of S-72 were analyzed by a LC-MS/MS method.

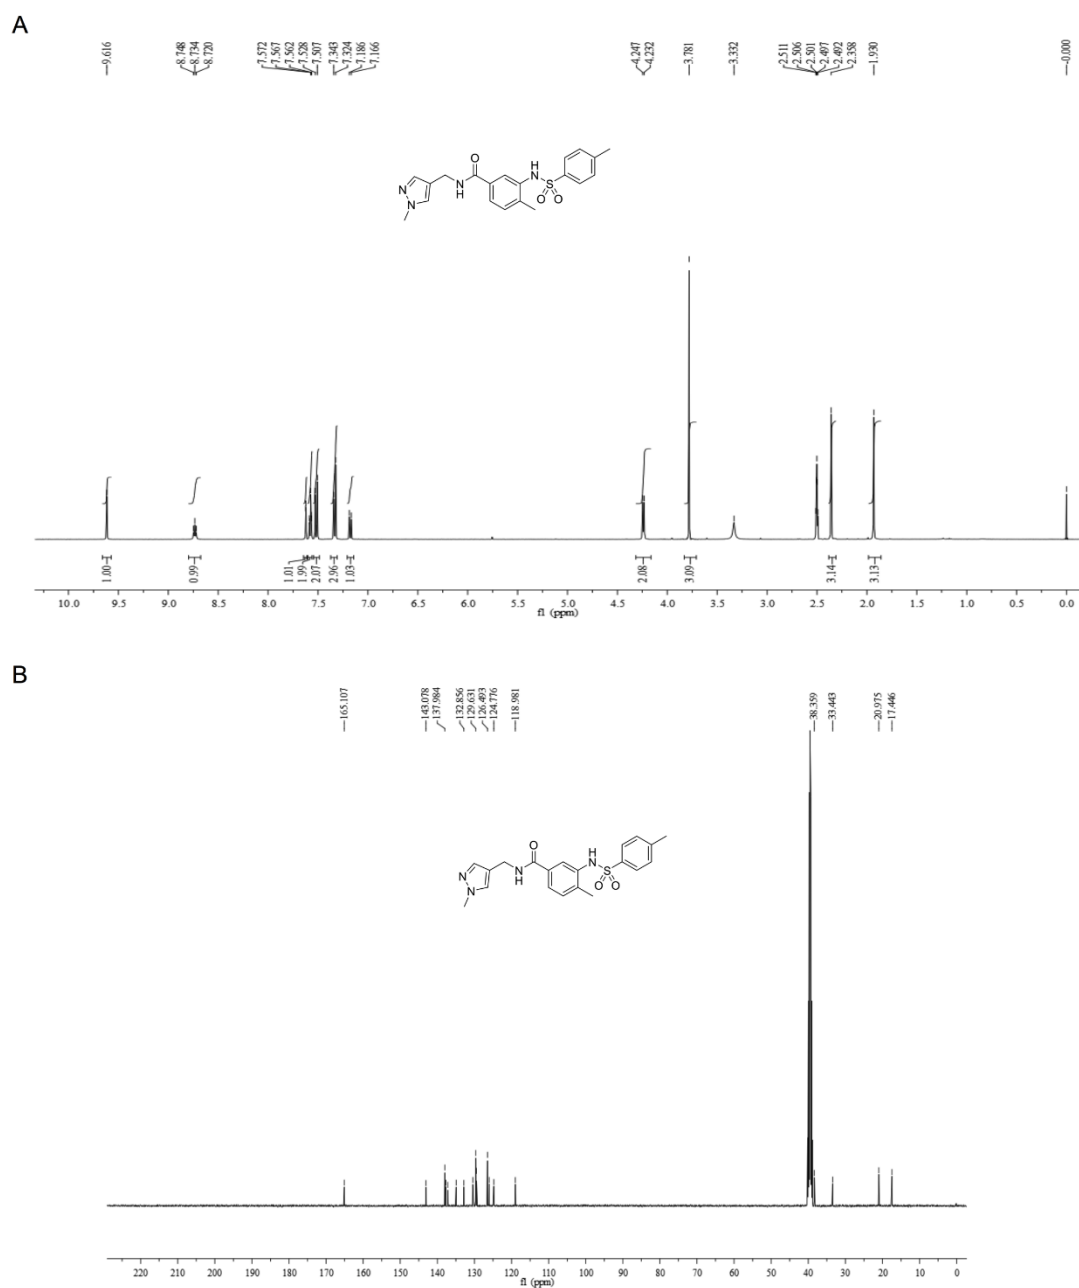

**Figure S2.** (A) <sup>1</sup>H NMR and (B) <sup>13</sup>C NMR spectrum of S-72.

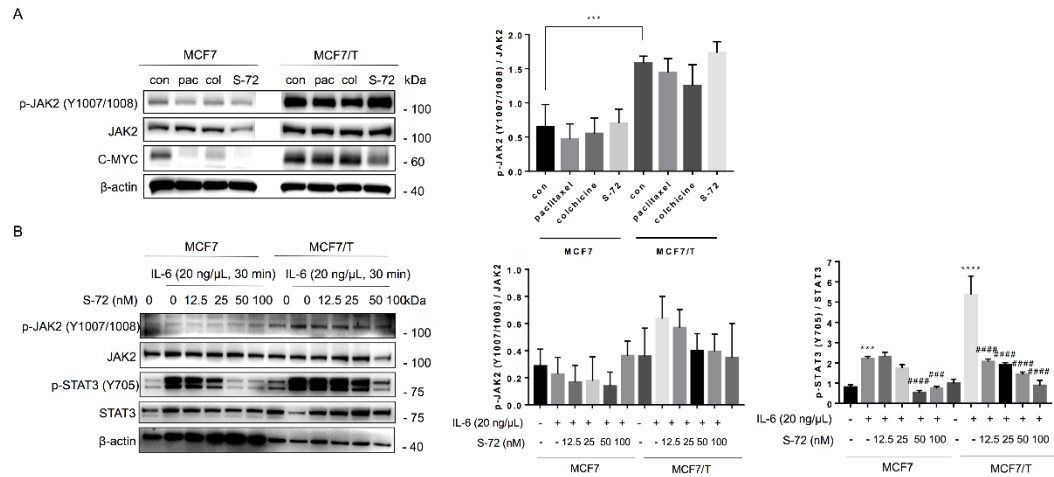

**Figure S3.** S-72 inhibits STAT3 activation in both MCF7 and MCF7/T cells. (A) Protein levels of p-JAK2 (Y1007/1008), JAK2 and C-MYC were identified by western blot after treatment with 100 nM paclitaxel, 100 nM colchicine or 100 nM S-72 for 24 h. (B) S-72 concentration-dependently inhibited STAT3 phosphorylation at Tyr705 induced by IL-6 in MCF7 and MCF7/T cells.  $N = 3$ ,  $*p < 0.05$ ,  $**p < 0.01$ ,  $***p < 0.001$ ,  $****p < 0.0001$  versus con and  $\#p < 0.05$ ,  $\##p < 0.01$ ,  $\###p < 0.001$ ,  $####p < 0.0001$  versus the IL-6 group.



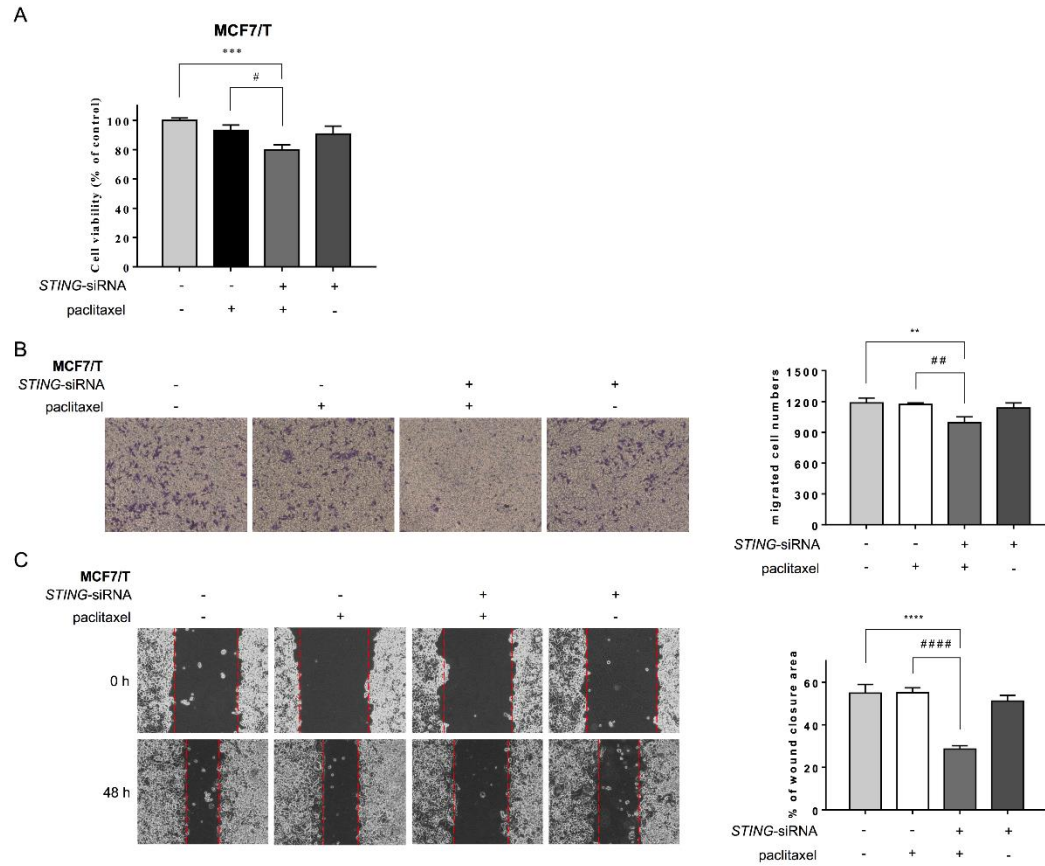

**Figure S5.** Knockdown of STING restores sensitivity to paclitaxel in MCF7/T cells. (A) Cell viability determined by CCK8 assay. (B-C) Effects of STING knockdown on paclitaxel sensitivity evaluated by (B) transwell migration assay and (C) wound healing assay.  $N = 3$ ,  $*p < 0.05$ ,  $**p < 0.01$ ,  $***p < 0.001$ ,  $****p < 0.0001$  versus the control group and  $^{\#}p < 0.05$ ,  $^{\#\#}p < 0.01$ ,  $^{\#\#\#}p < 0.001$ ,  $^{\#\#\#\#}p < 0.0001$  versus the paclitaxel-treated group.

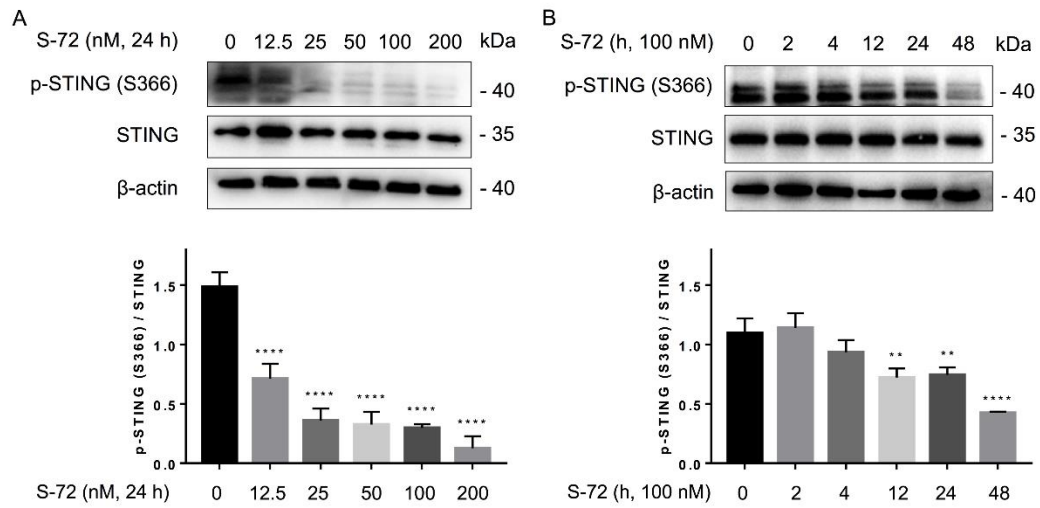

**Figure S6.** Changes in protein levels of p-STING (Ser366) after S-72 treatment. (A) Dose course study on the effect of S-72 treatment on p-STING (Ser366) expressions in MCF7/T cells. Cells were treated with gradient concentrations of S-72 for 24 h. (B) Time course study on the effect of S-72 treatment on p-STING (Ser366) expressions in MCF7/T cells. Cells were treated with 100 nM S-72 for various time periods. Protein levels were detected by western blot analysis.  $N = 3$ , \* $p < 0.05$ , \*\* $p < 0.01$ , \*\*\* $p < 0.001$ , \*\*\*\* $p < 0.0001$  versus con.

**Table S1.** Pharmacokinetic parameters of S-72.

| Parameters         | Units   | po. (5 mg/kg) | iv. (1 mg/kg) |
|--------------------|---------|---------------|---------------|
| $t_{1/2\beta}$     | h       | 4.07          | 0.38          |
| $T_{\max}$         | h       | 0.083         | 0.03          |
| $C_{\max}$         | ng/ml   | 1436          | 1192          |
| $AUC_{(0-t)}$      | h*ng/ml | 1740          | 469           |
| $AUC_{(0-\infty)}$ | h*ng/ml | 1962          | 480           |
| $MRT_{(0-t)}$      | h       | 3.26          | 0.42          |
| $MRT_{(0-\infty)}$ | h       | 4.92          | 0.46          |
| $V_z$              | ml/kg   | -             | 1155          |
| CL                 | ml/h/kg | -             | 2084          |
| F%                 | -       | 74.1          | -             |
